# Supplementary material for: Shape matters: the diffusion rates of TMV rods and CPMV icosahedrons in a spheroid model of extracellular matrix are distinct
Source: Royal Society of Chemistry journal article supplement (doi:10.1039/c3bm00191a), 2013-01-01
Supplement: c3bm00191a.pdf [file c3bm00191a.pdf]

## Supporting Information

### Shape matters: the diffusion rates of TMV rods and CPMV icosahedrons in a spheroid model of extracellular matrix are distinct

<sup>5</sup> Karin L. Lee<sup>#1</sup>, Logan C. Hubbard<sup>#1</sup>, Stephen Hern<sup>1</sup>, Ibrahim Yildiz<sup>1</sup>, Miklos Gratzl<sup>1\*</sup>, and Nicole F. Steinmetz<sup>1,2,3\*</sup>

Department of <sup>1</sup> Biomedical Engineering, <sup>2</sup> Radiology, <sup>3</sup> Materials Science and Engineering, Case Western Reserve University, Schools of  
<sup>10</sup> Medicine and Engineering, 10900 Euclid Avenue, Cleveland, OH 44106, USA.

# both authors contributed equally to the work.

\* corresponding author: [miklos.gratzl@case.edu](mailto:miklos.gratzl@case.edu) and [nicole.steinmetz@case.edu](mailto:nicole.steinmetz@case.edu)

<sup>15</sup>

#### Experimental Section

**CPMV and TMV propagation:** Previously published procedures  
<sup>20</sup> were used to propagate CPMV and TMV in *V. unguiculata* and  
*N. benthamiana*. A combination of chloroform:butanol  
extraction, PEG precipitation, and ultracentrifugation over  
sucrose gradients was used to extract CPMV and TMV from  
infected leaf materials.[1, 2] Virus was resuspended and kept in  
<sup>25</sup> 0.1 M potassium phosphate buffer pH 7.0; virus concentration  
was determined by UV/visible spectroscopy using known  
extinction coefficients at 260 nm ( $\epsilon_{\text{CPMV}}=8.1 \text{ mLmg}^{-1}\text{cm}^{-1}$  and  
 $\epsilon_{\text{TMV}}=3.0 \text{ mLmg}^{-1}\text{cm}^{-1}$ ).

**Bioconjugate chemistry to modify CPMV and TMV with A555  
and O488:** CPMV (in 0.1 M potassium phosphate buffer pH 7.0)  
was reacted with NHS-A555 (Invitrogen). Reagents were added  
in a 10% (v/v) final concentration of DMSO and incubated  
overnight at room temperature, with agitation. NHS-A555 was  
<sup>35</sup> added using a molar excess of 2,000 per CPMV. CPMV has a  
molar mass of  $5.6 \times 10^6 \text{ gmol}^{-1}$ . Purification was performed  
through extensive dialysis. To add alkynes to the interior  
carboxylic acids, TMV (in 0.1 M potassium phosphate buffer pH  
7.0) was first reacted with propargylamine, along with the  
<sup>40</sup> addition of ethylene carbodiimide (EDC) coupling to activate the  
carboxylic acids. Propargylamine and EDC were added using an  
excess of 25 and 15 equivalents (eq), respectively. To decorate  
the exterior TMV surface, the phenol ring of tyrosine underwent  
an electrophilic substitution (pH=9, 30 min.) with the diazonium  
salt generated from 3-ethynylaniline (25 molar eq) to incorporate  
a terminal alkyne. TMV has a molar mass of  $39.4 \times 10^6 \text{ gmol}^{-1}$ . The  
reaction was incubated overnight at room temperature. TMV-  
interior alkyne (TMV-iAlk) and TMV-exterior alkyne (TMV-  
eAlk) were centrifuged at 42,000 rpm (Beckman 50.2 Ti) for 2.5  
<sup>50</sup> hours at 4°C. The pellet was resuspended overnight in 1 mL of  
0.1 M potassium phosphate buffer (pH 7.0). TMV-iAlk/eAlk was  
reacted with O488-azide (Invitrogen) using Cu(I)-catalyzed  
azide-alkyne 1,3-dipolar cycloaddition (CuAAC) reaction. O488-  
azide was added using a molar excess of 2 eq. The reaction was  
<sup>55</sup> incubated on ice for 5 minutes, followed by a 25 minute  
incubation at room temperature. TMV-O488 was purified at  
27,000 rpm (Beckman 50.2 Ti) over a 10-40% sucrose gradient  
for 2 hours. The TMV protein band was collected and  
<sup>60</sup> subsequently ultracentrifuged at 42,000 rpm (Beckman 50.2 Ti)  
for 2.5 hours, and the resulting pellet was resuspended in 1 mL

0.1 M potassium phosphate buffer (pH 7.0) overnight. We found  
no differences studying TMV labeled with O488 at the interior  
*versus* exterior sites.

<sup>65</sup> **UV/visible spectroscopy:** UV/visible spectra were recorded using  
a NanoDrop 2000 spectrophotometer.

**Denaturing gel electrophoresis:** 10  $\mu\text{g}$  protein samples were  
analyzed on 4-12% NuPage gels (Life Technologies) in 1x  
MOPS SDS running buffer. Protein bands were visualized under  
<sup>70</sup> UV light before staining and under white light after staining the  
gels with Coomassie blue (0.25% w/v).

**Size exclusion chromatography (SEC):** Size exclusion  
<sup>75</sup> chromatography was performed using a Superose 6 column on  
the ÄKTA Explorer chromatography system (GE Healthcare).  
CPMV-A555 nanoparticles and TMV-O488 nanorods (100  $\mu\text{g}$  in  
200  $\mu\text{L}$ ) were analyzed at a flow rate of  $0.5 \text{ mL min}^{-1}$  in 0.1 M  
potassium phosphate buffer (pH 7.0).

<sup>80</sup> **Transmission electron microscopy (TEM):** CPMV-A555  
nanoparticles and TMV-O488 nanorods (20  $\mu\text{L}$ ,  $0.1 \text{ mg mL}^{-1}$ )  
were negatively stained with 2% (w/v) uranyl acetate for 5 min  
on a carbon-coated copper grid. Samples were analyzed using a  
<sup>85</sup> Zeiss Libra 200FE transmission electron microscope operated at  
200 kV.

**Dynamic light scattering (DLS) and zeta potential  
measurements:** DLS and zeta potential measurements were  
<sup>90</sup> carried out using a 90 Plus zeta potential analyzer (Brookhaven  
Instruments Co., USA). Four measurements for CPMV-A555  
nanoparticles and TMV-O488 nanorods (1.5 mL of  $0.1 \text{ mg mL}^{-1}$   
solutions) were taken, each comprising eight runs.

<sup>95</sup> **Preparation of the spheroids:** Spheroids were prepared from 1%  
(w/v) agarose type VII (2-hydroxyethylagarose type VII, low  
gelling temperate, Sigma-Aldrich) in PBS at pH 7.4. To dissolve  
the agarose, the mixture was heated at 50°C for 30 min with  
magnetic stirring. Upon uniform mixing, the agarose reservoir  
was then used to generate spheroids in an untreated 24-well dish.  
<sup>100</sup> In brief, 0.25 – 0.75  $\mu\text{L}$  of liquid agarose was dropped on the  
bottom of the well where it gelled instantaneously as a half-  
spheroid. The spheroid hemispheres were kept between 200-800  
 $\mu\text{m}$  in diameter. After placement of the spheroids, 75  $\mu\text{L}$  of PBS

were added to keep them hydrated. Spheroids were prepared fresh for all experiments.

**Confocal imaging:** An Olympus FV1000 laser scanning confocal microscope was used for imaging. The spheroid plate was placed on the confocal stage, and the optical scope was used to find a spheroid of appropriate size and shape that was without defects. Imaging was performed using 10x magnification. The imaging plane was kept constant during the entire study. First blank images were taken to correct for autofluorescence. Then, VNPs were added at 0.032 mg/mL protein concentration in PBS (total volume was 200  $\mu$ L). Image files were saved as .raw files and analyzed using ImageJ software. Data were processed in MatLab.

**MatLab data analysis:** (RAW (grey scale) images were imported into MatLab, converted into DOUBLE data types, divided by 255, and stored as pixel intensities (ranging from 0-1) in CELL arrays. Within these arrays, all images were normalized according to the same scheme. Specifically, for each image, the average intensity of the surrounding solution (outside the spheroid) was determined. Each image was then multiplied individually by the inverse of its own solution intensity, resulting in a new normalized solution intensity of 100% for all images. The images were then rescaled to populate the entire plot range. All normalization procedures were performed symmetrically between

VNP data, such that TMV and CPMV diffusion properties could be compared. To generate the figures, four radially oriented pixel sections were selected from each image, spanning outwards from the center of a spheroid to 50  $\mu$ m past its edge (into the surrounding solution). All pixel sections were equivalent in size (20 pixels wide by 250 pixels long,  $\sim$  25  $\mu$ m x 325  $\mu$ m). Each section was adjusted such that all four sections were aligned in the same direction, and horizontal averaging of sections was performed, resulting in a single average intensity vector with greatly improved signal-to-noise ratio. Using this intensity vector, plots were generated depicting the average intensity *versus* distance, at multiple time points. Additionally, plots depicting the average intensity *versus* time, at 100  $\mu$ m (from the edge of the a spheroid toward its center), were also generated. The rate of intensity change *versus* time, at 100  $\mu$ m, was also calculated from the data.

#### References:

- [1] Foster GD, Taylor S. Plant Virology Protocols: From Virus Isolation to Transgenic Resistance. Humana Press; 1998.
- [2] Steinmetz NF, Cho CF, Ablack A, Lewis JD, Manchester M. Cowpea mosaic virus nanoparticles target surface vimentin on cancer cells. Nanomedicine. 2011;6:351-64.

## Supporting Figures

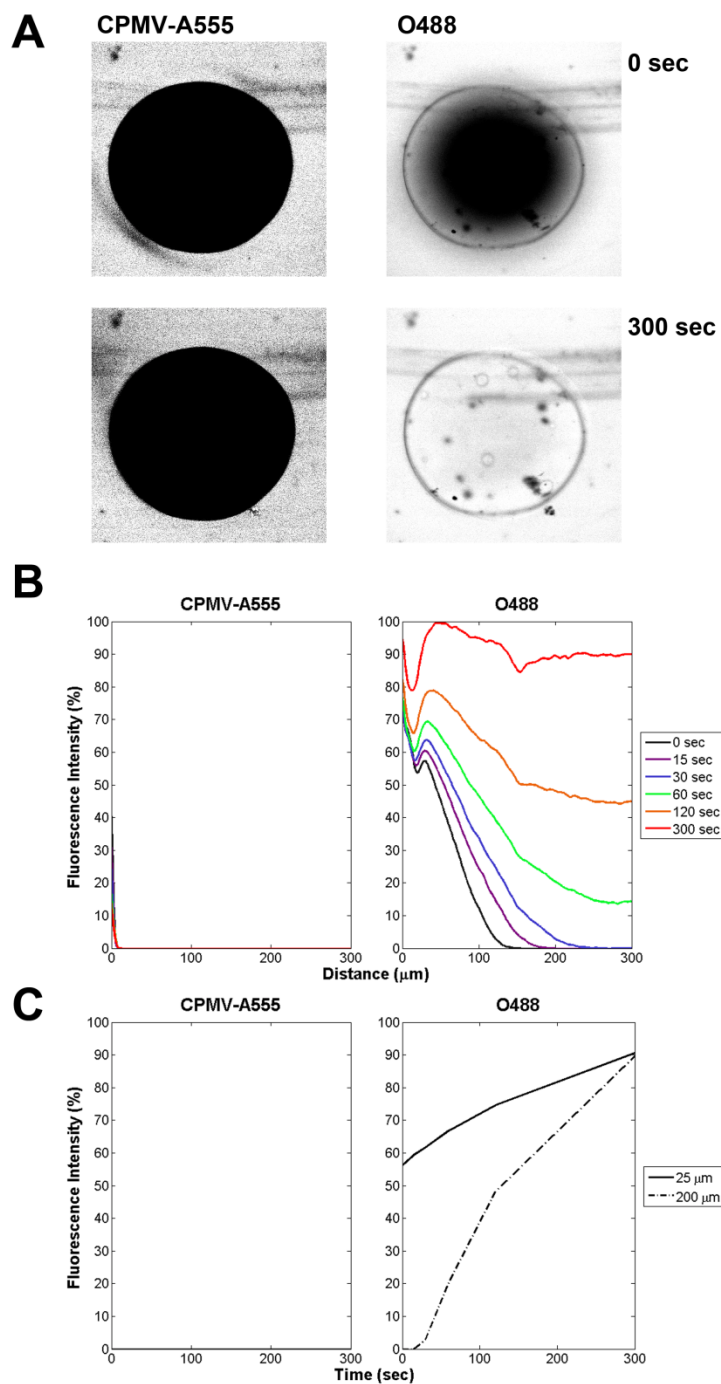

5 **Figure S1: Diffusion rates of CPMV sphere versus free O448 dye into agarose half-spheroids.** **A:** Snapshots of confocal images showing distinct diffusion of CPMV-A555 versus O488 dye. Time point 0 sec does not represent 0 sec exactly: this is due to the delay between adding the samples into the reservoir and acquiring the first image. It is apparent from the data that dye diffusion occurs rapidly and the spheroid is saturated within minutes. **B:** Imaging data were analyzed using ImageJ and MatLab software. The fluorescence intensity normalized against reservoir fluorescence intensity (saturated with VNPs or dyes) is plotted over distance, with 0  $\mu\text{m}$  being the edge of the spheroid structure. Fluorescence intensity versus distance is plotted over time. **C)** Fluorescence intensity over time is plotted measured at 25 and 200  $\mu\text{m}$  distance within the spheroid.

10

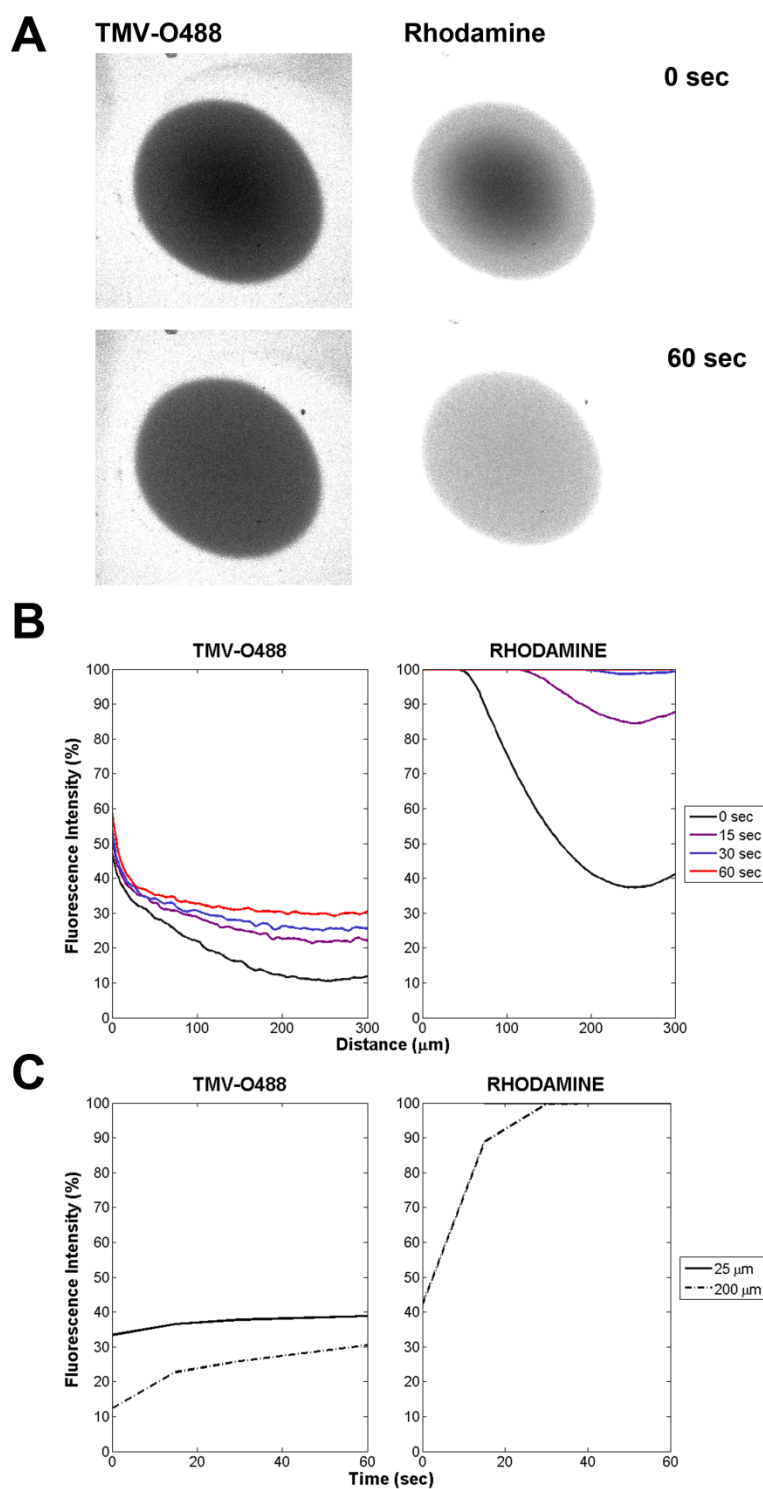

**Figure S2: Diffusion rates of TMV rod versus free Rhodamine red dye into agarose half-spheroids.** *A:* Snapshots of confocal images showing distinct diffusion of TMV-O488 versus Rhodamine red dye. Time point 0 sec does not represent 0 sec exactly: this is due to the delay between adding the samples into the reservoir and acquiring the first image. It is apparent from the data that dye diffusion occurs rapidly and the spheroid is saturated within minutes. *B:* Imaging data were analyzed using ImageJ and MatLab software. The fluorescence intensity normalized against reservoir fluorescence intensity (saturated with VNPs or dyes) is plotted over distance, with 0  $\mu\text{m}$  being the edge of the spheroid structure. Fluorescence intensity versus distance is plotted over time. *C:* Fluorescence intensity over time is plotted measured at 25 and 200  $\mu\text{m}$  distance within the spheroid.
